# Supplementary material for: White light emitting soft materials from off-the-shelf ingredients
Source: Royal Society of Chemistry journal article supplement (doi:10.1039/c5tc01072a), 2015-01-01
Supplement: c5tc01072a1.pdf [file c5tc01072a1.pdf]

## Supporting Information

### White light emitting soft materials from off-the-shelf ingredients

Raju Laishram, Sandip Bhowmik, Uday Maitra\*

Department of Organic Chemistry, Indian Institute of Science, Bangalore-560012, Karnataka, India

#### Job plots

Titration of  $Tb^{3+}$ ,  $Eu^{3+}$  and  $Zn^{2+}$  with DHN (2 mM solutions were used) were studied by absorption spectroscopy in HEPES-Acetic Acid buffer (pH 7). From these job plots it was observed that all metal ions formed 1:1 complex with DHN.

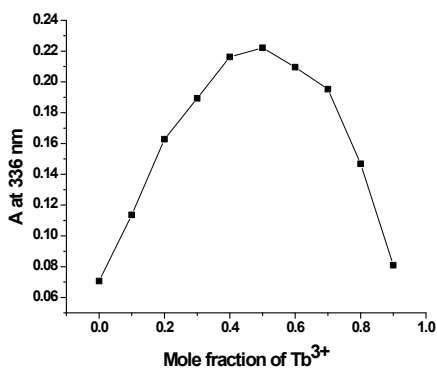

Figure S1 Job's plot for  $Tb^{3+}$  and DHN

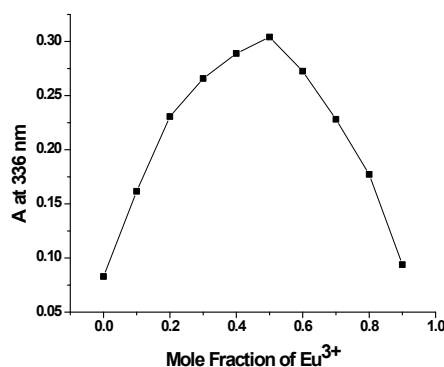

Figure S2 Job's plot for  $Eu^{3+}$  and DHN

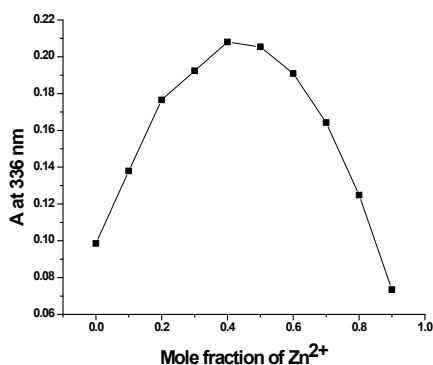

Figure S3 Job's plot for  $Zn^{2+}$  and DHN

#### Binding constant determination

Binding constants of metals and DHN were determined by fluorescence titration,<sup>1</sup> in which fixed concentrations of DHN was taken with increasing metal ion concentration (in HEPES-Acetic Acid buffer, pH 7)

As the binding is 1:1 mode, the binding reaction can be represented as

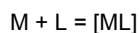

Where L is DHN and M is Metal ion ( $Tb^{3+}$ ,  $Eu^{3+}$  or  $Zn^{2+}$ )

The Binding Constant will be given by

$$K = \frac{[ML]}{[M][L]}$$

$$[M] = [M_0] - [ML]; [L] = [L_0] - [ML]$$

$[M_0]$  and  $[L_0]$  are concentrations before formation of the complex.

So,

$$K = \frac{[ML]}{[M_o] - [ML]} \frac{[L_o] - [ML]}{[ML]}$$

For fluorescence measurements the following equation is followed

$$F = F_L[L] + F_M[M] + F_{ML}[ML]$$

F is the intensity of total fluorescence observed,  $F_L$  for DHN,  $F_M$  for the metals and  $F_{ML}$  for the Metal-DHN complex which can be substituted by the maximum F i.e.,  $F_{max}$ . Since the metals are not fluorescent at 380 nm (wavelength under study) the equation can be simplified as

$$F = F_L[L] + F_{max}[ML]$$

$$\text{Using } [L] = [L_o] - [ML]$$

$$F = F_L + (F_{max} - F_L) \frac{[ML]}{[L_o]}$$

$$[ML] = \frac{(F - F_L) [L_o]}{(F_{max} - F_L)} = \frac{\Delta F [L_o]}{\Delta F_{max}}, \text{ where } \Delta F = (F - F_L); \Delta F_{max} = (F_{max} - F_L)$$

Then,

$$K = \frac{\{\Delta F \times [L_o] / \Delta F_{max}\} / \{[L_o] - \Delta F \times [L_o] / \Delta F_{max}\} \{[M_o] - \Delta F \times [L_o] / \Delta F_{max}\}}$$

Using this equation K value of the complexes was determined.

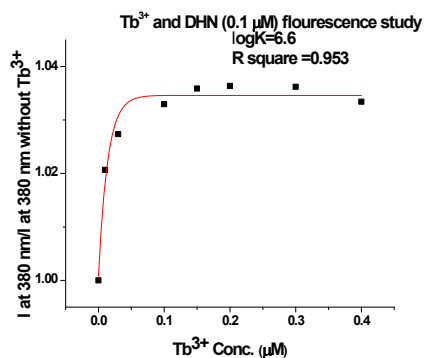

Figure S4 Fluorescence titration curve of  $Tb^{3+}$  and DHN

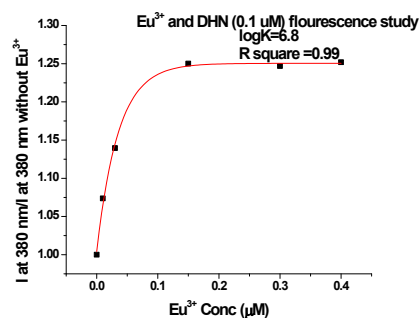

Figure S5 Fluorescence titration curve of  $Eu^{3+}$  and DHN

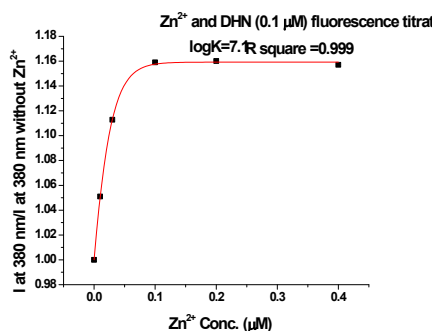

Figure S6 Fluorescence titration curve of  $Zn^{2+}$  and DHN

(1) C. Xu, C. Zhao, J. Ren and X. Qu, *Chem. Commun.*, 2011, **47**, 8043.
